# Supplementary material for: Learning and forgetting using reinforced Bayesian change detection
Source: PubMed Central journal article supplement (PMC6488101; doi:10.1371/journal.pcbi.1006713), 2019-04-17
Supplement: pcbi.1006713.s001.pdf [file pcbi.1006713.s001.pdf]

## Appendix A Normalizing constant of the exponential mixture prior distribution

Let us consider a prior distribution from the exponential family of the form

$$f(\mathbf{z}|\boldsymbol{\theta}) = h(\mathbf{z}) \exp(\boldsymbol{\theta}^T \mathbf{T}(\mathbf{z}) - A(\boldsymbol{\theta})). \quad (1)$$

Assuming that the approximate posterior  $q(\mathbf{z}|\boldsymbol{\theta}_{j-1})$  has the same form as the prior distribution (which arises naturally in the VB scheme we are using), we are interested in deriving

$$\begin{aligned} Z(w, \boldsymbol{\theta}_{j-1}, \boldsymbol{\theta}_0) &= \int f(\mathbf{z}|\boldsymbol{\theta}_{j-1})^w f(\mathbf{z}|\boldsymbol{\theta}_0)^{1-w} d\mathbf{z} \\ &= \int \exp \left( w \left( \boldsymbol{\theta}_{j-1}^T \mathbf{T}(\mathbf{z}) + \log h(\mathbf{z}) - A(\boldsymbol{\theta}_{j-1}) \right) + \right. \\ &\quad \left. (1-w) \left( \boldsymbol{\theta}_0^T \mathbf{T}(\mathbf{z}) + \log h(\mathbf{z}) - A(\boldsymbol{\theta}_0) \right) \right) d\mathbf{z} \\ &= \int h(\mathbf{z}) \exp \left( w \left( \boldsymbol{\theta}_{j-1}^T \mathbf{T}(\mathbf{z}) - A(\boldsymbol{\theta}_{j-1}) \right) + \right. \\ &\quad \left. (1-w) \left( \boldsymbol{\theta}_0^T \mathbf{T}(\mathbf{z}) - A(\boldsymbol{\theta}_0) \right) \right) \\ &\quad \times \exp \left( A(w\boldsymbol{\theta}_{j-1} + (1-w)\boldsymbol{\theta}_0) - A(w\boldsymbol{\theta}_{j-1} + (1-w)\boldsymbol{\theta}_0) \right) d\mathbf{z} \\ &= \int \underbrace{h(\mathbf{z}) \exp \left( (w\boldsymbol{\theta}_{j-1} + (1-w)\boldsymbol{\theta}_0)^T \mathbf{T}(\mathbf{z}) - A(w\boldsymbol{\theta}_{j-1} + (1-w)\boldsymbol{\theta}_0) \right)}_{=1} d\mathbf{z} \\ &\quad \times \exp(-wA(\boldsymbol{\theta}_{j-1}) - (1-w)A(\boldsymbol{\theta}_0) + A(w\boldsymbol{\theta}_{j-1} + (1-w)\boldsymbol{\theta}_0)) \\ &= \exp(-wA(\boldsymbol{\theta}_{j-1}) - (1-w)A(\boldsymbol{\theta}_0) + A(w\boldsymbol{\theta}_{j-1} + (1-w)\boldsymbol{\theta}_0)). \end{aligned} \quad (2)$$

This result simplifies when combined with the numerator of Eq 8:

$$\begin{aligned} p(\mathbf{z}|\boldsymbol{\theta}_{j-1}, \boldsymbol{\theta}_0, w) &= \frac{h(\mathbf{z}) \exp \left( (w\boldsymbol{\theta}_{j-1} + (1-w)\boldsymbol{\theta}_0)^T \mathbf{T}(\mathbf{z}) - wA(\boldsymbol{\theta}_{j-1}) - (1-w)A(\boldsymbol{\theta}_0) \right)}{\exp(-wA(\boldsymbol{\theta}_{j-1}) - (1-w)A(\boldsymbol{\theta}_0) + A(w\boldsymbol{\theta}_{j-1} + (1-w)\boldsymbol{\theta}_0))} \\ &= h(\mathbf{z}) \exp \left( (w\boldsymbol{\theta}_{j-1} + (1-w)\boldsymbol{\theta}_0)^T \mathbf{T}(\mathbf{z}) - A(w\boldsymbol{\theta}_{j-1} + (1-w)\boldsymbol{\theta}_0) \right) \end{aligned} \quad (3)$$

which has the form of a distribution from the exponential family where the natural parameters of the two parts of the mixture are weighted according to  $w$  and  $1-w$ .

If we are to find an analytical form to the lower bound  $\mathcal{L}(q(\mathbf{z}, w)) = \mathbb{E}_{q(\mathbf{z}, w)} [\log p(\mathbf{x}, \mathbf{z}, w) - \log q(\mathbf{z}, w)]$ , we also need to compute the expected log-partition function given the approximate posterior  $q(\mathbf{z}, w)$ :  $-\mathbb{E}_{q(\mathbf{z}, w)} [A(w\boldsymbol{\theta}_{j-1} + (1-w)\boldsymbol{\theta}_0)]$ . This expectation has usually not a closed-form expression, but it can be approximated efficiently if we consider its second order Taylor

expansion. Indeed,

$$\begin{aligned}
 A(w\boldsymbol{\theta}_{j-1} + (1-w)\boldsymbol{\theta}_0) &= A(w_0\boldsymbol{\theta}_{j-1} + (1-w_0)\boldsymbol{\theta}_0) \\
 &+ \nabla_{w_0} A(w_0\boldsymbol{\theta}_{j-1} + (1-w_0)\boldsymbol{\theta}_0) (w - w_0) \\
 &+ \frac{\nabla_{w_0}^2 A(w_0\boldsymbol{\theta}_{j-1} + (1-w_0)\boldsymbol{\theta}_0)}{2} (w - w_0)^2 + \mathcal{O}(|w_0 - w|^3).
 \end{aligned} \tag{4}$$

If we replace  $w_0$  by the expected value of  $w$  under the approximate posterior  $w_0 \triangleq \mathbb{E}_{q(w)}[w] = \hat{w}$ , and given that  $\mathbb{E}_{q(w)}[(w - \hat{w})] = 0$ , the expected value of the log-partition function can be approximated with

$$\begin{aligned}
 \mathbb{E}_{q(w)}[A(w\boldsymbol{\theta}_{j-1} + (1-w)\boldsymbol{\theta}_0)] &\approx A(\hat{w}\boldsymbol{\theta}_{j-1} + (1-\hat{w})\boldsymbol{\theta}_0) \\
 &+ \frac{1}{2} \nabla_{\hat{w}}^2 A(\hat{w}\boldsymbol{\theta}_{j-1} + (1-\hat{w})\boldsymbol{\theta}_0) \text{Var}_{q(w)}[w]
 \end{aligned} \tag{5}$$

with  $\hat{w} = \mathbb{E}_{q(w)}[w]$ .
